# Supplementary material for: Enhanced exciton emission behavior and tunable band gap of ternary W(SxSe1−x)2 monolayer: temperature dependent optical evidence and first-principles calculations
Source: Royal Society of Chemistry journal article supplement (doi:10.1039/c8nr01823e), 2018-01-01
Supplement: c8nr01823e1.pdf [file c8nr01823e1.pdf]

## Supporting Information

### Enhanced exciton emission behaviors and tunable band gap of ternary $W(S_xSe_{1-x})_2$ monolayer: Temperature dependent optical evidence and first-principles calculations

Huimin Sun,<sup>a</sup> Junyong Wang,<sup>a</sup> Fang Wang,<sup>a</sup> Liping Xu,<sup>a</sup> Kai Jiang,<sup>a</sup> Liyan Shang,<sup>a</sup>  
Zhigao Hu,<sup>\*,a,b</sup> and Junhao Chu<sup>a</sup>

<sup>a</sup> Key Laboratory of Polar Materials and Devices (MOE) and Technical Center for Multifunctional  
Magneto-Optical Spectroscopy (Shanghai), Department of Electronic Engineering, East China Normal  
University, Shanghai 200241, China

<sup>b</sup> Collaborative Innovation Center of Extreme Optics, Shanxi University, Taiyuan, Shanxi 030006, China

\* Author to whom correspondence should be addressed. Tel.: +86-21-54345150. Fax: +86-21-54345119.

Electronic mail: [zghu@ee.ecnu.edu.cn](mailto:zghu@ee.ecnu.edu.cn) (Dated: Wednesday 25<sup>th</sup> April, 2018)

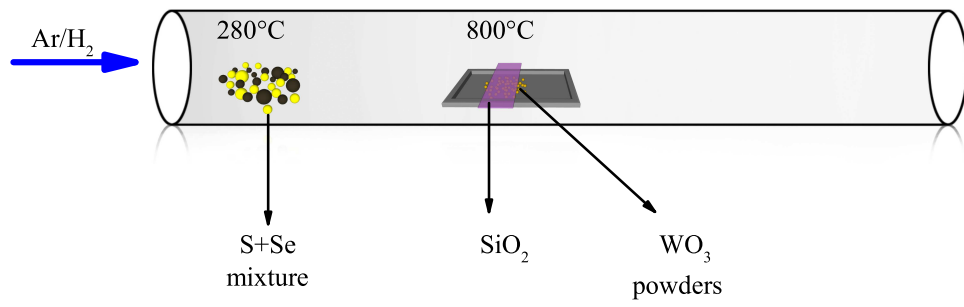

Fig. S 1: Schematic illustration of the CVD growth for  $\text{W}(\text{S}_x\text{Se}_{1-x})_2$  alloy nanosheets.

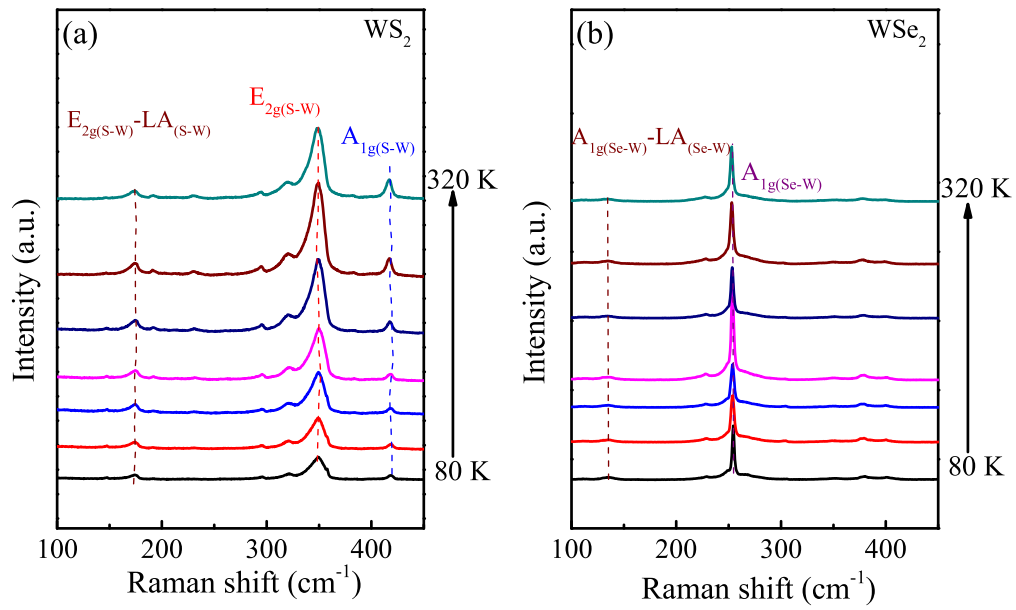

Fig. S 2: Raman spectra as a function of temperature for a chemical vapor deposited single layer (a) WS<sub>2</sub>, and (b) WSe<sub>2</sub>, respectively.

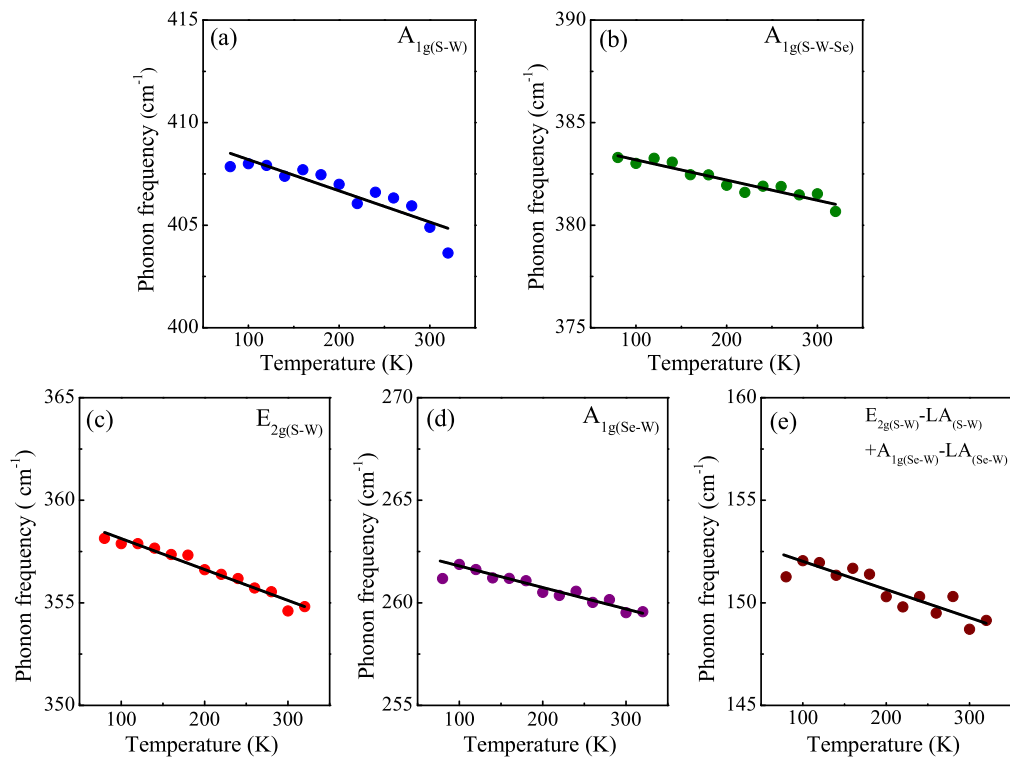

Fig. S 3: Phonon frequency of five main vibrational modes as a function of temperature for monolayer  $\text{W}(\text{S}_{0.5}\text{Se}_{0.5})_2$  nanosheets.

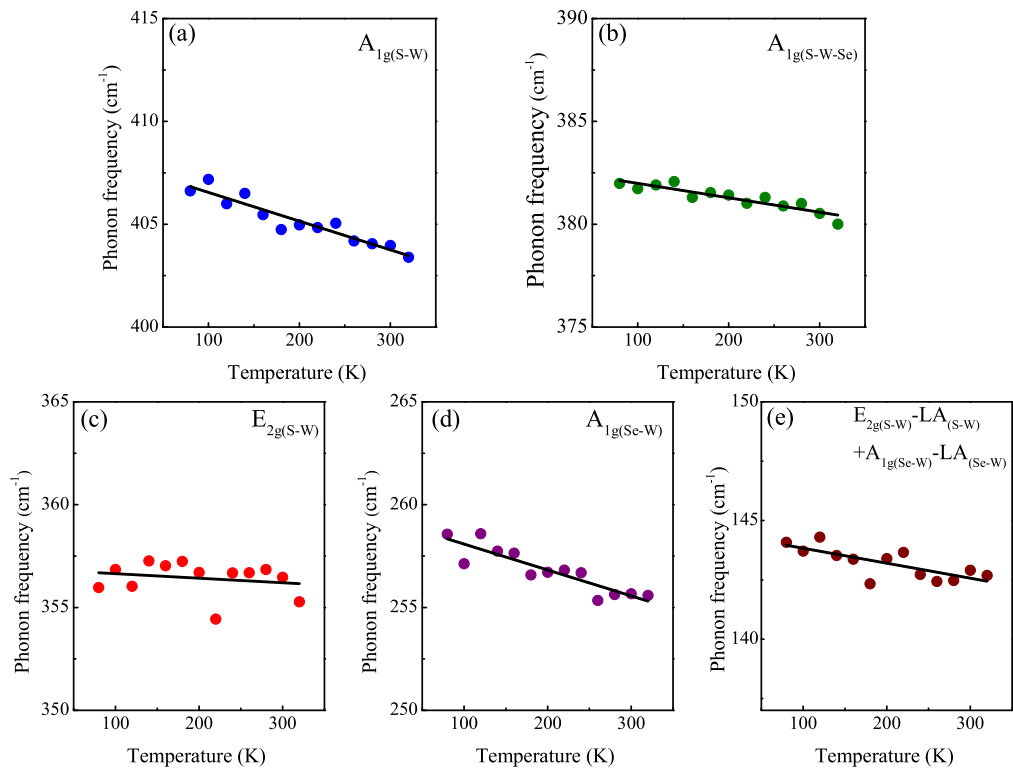

Fig. S 4: Phonon frequency of five main vibrational modes as a function of temperature for monolayer  $\text{W}(\text{S}_{0.3}\text{Se}_{0.7})_2$  nanosheets.

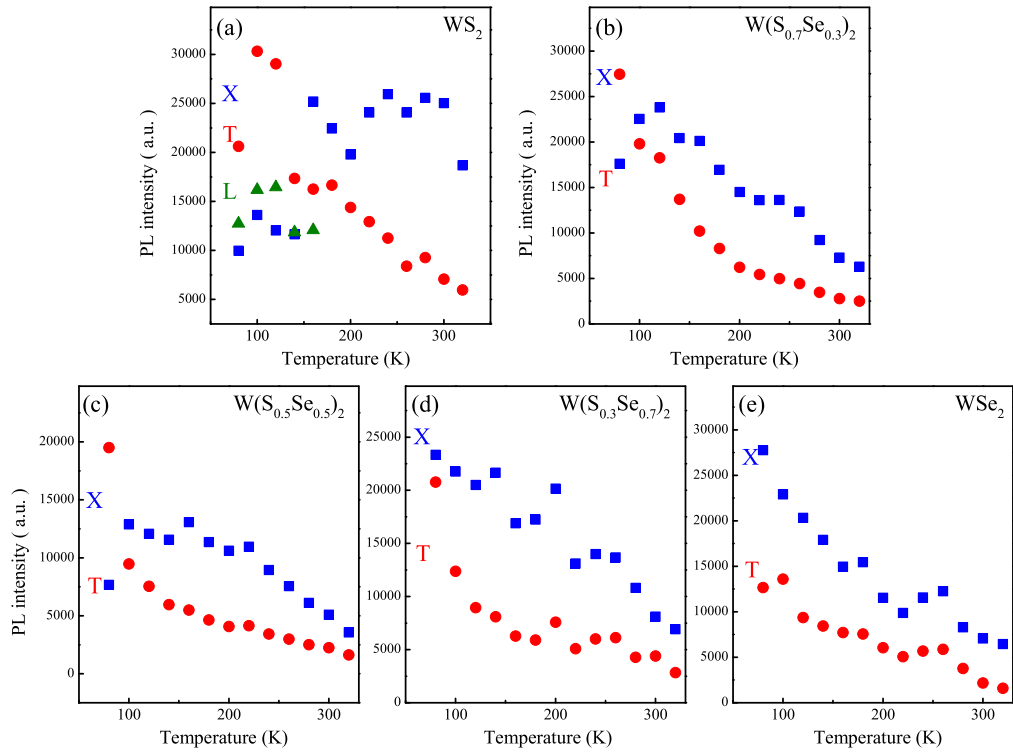

Fig. S 5: The PL intensities of the exciton (X) and trion (T) emissions as a function of temperature for monolayer alloy nanosheets: (a)  $\text{WS}_2$ , (b)  $\text{W}(\text{S}_{0.7}\text{Se}_{0.3})_2$ , (c)  $\text{W}(\text{S}_{0.5}\text{Se}_{0.5})_2$ , (d)  $\text{W}(\text{S}_{0.3}\text{Se}_{0.7})_2$  and (e)  $\text{WSe}_2$ , respectively.
